# Biomarkers of Histone Deacetylase Inhibitor Activity in a Phase 1 Combined-Modality Study with Radiotherapy

Anne Hansen Ree<sup>1,2\*</sup>, Marie Grøn Saelen<sup>3,2</sup>, Erta Kalanxhi<sup>1</sup>, Ingrid H. G. Østensen<sup>4</sup>, Kristina Schee<sup>3</sup>, Kathrine Røe<sup>1</sup>, Torveig Weum Abrahamsen<sup>3</sup>, Svein Dueland<sup>5</sup>, Kjersti Flatmark<sup>3,6</sup>

**1** Department of Oncology, Akershus University Hospital, Lørenskog, Norway, **2** Institute of Clinical Medicine, University of Oslo, Oslo, Norway, **3** Department of Tumor Biology, Oslo University Hospital – Norwegian Radium Hospital, Oslo, Norway, **4** Department of Genes and Environment, Norwegian Institute of Public Health, Oslo, Norway, **5** Department of Oncology, Oslo University Hospital – Norwegian Radium Hospital, Oslo, Norway, **6** Department of Gastroenterological Surgery, Oslo University Hospital – Norwegian Radium Hospital, Oslo, Norway

## Abstract

**Background:** Following the demonstration that histone deacetylase inhibitors enhanced experimental radiation-induced clonogenic suppression, the Pelvic Radiation and Vorinostat (PRAVO) phase 1 study, combining fractionated radiotherapy with daily vorinostat for pelvic carcinoma, was designed to evaluate both clinical and novel biomarker endpoints, the latter relating to pharmacodynamic indicators of vorinostat action in clinical radiotherapy.

**Patients and Methods:** Potential biomarkers of vorinostat radiosensitizing action, not simultaneously manifesting molecular perturbations elicited by the radiation itself, were explored by gene expression array analysis of study patients' peripheral blood mononuclear cells (PBMC), sampled at baseline (T0) and on-treatment two and 24 hours (T2 and T24) after the patients had received vorinostat.

**Results:** This strategy revealed 1,600 array probes that were common for the comparisons T2 *versus* T0 and T24 *versus* T2 across all of the patients, and furthermore, that no significantly differential expression was observed between the T0 and T24 groups. Functional annotation analysis of the array data showed that a significant number of identified genes were implicated in gene regulation, the cell cycle, and chromatin biology. Gene expression was validated both in patients' PBMC and in vorinostat-treated human carcinoma xenograft models, and transient repression of *MYC* was consistently observed.

**Conclusion:** Within the design of the PRAVO study, all of the identified genes showed rapid and transient induction or repression and therefore, in principle, fulfilled the requirement of being pharmacodynamic biomarkers of vorinostat action in fractionated radiotherapy, possibly underscoring the role of *MYC* in this therapeutic setting.

**Citation:** Ree AH, Saelen MG, Kalanxhi E, Østensen IHG, Schee K, et al. (2014) Biomarkers of Histone Deacetylase Inhibitor Activity in a Phase 1 Combined-Modality Study with Radiotherapy. PLoS ONE 9(2): e89750. doi:10.1371/journal.pone.0089750

**Editor:** Venugopalan Cheriyaath, Texas A&M University, United States of America

**Received:** September 19, 2013; **Accepted:** January 22, 2014; **Published:** February 25, 2014

**Copyright:** © 2014 Ree et al. This is an open-access article distributed under the terms of the Creative Commons Attribution License, which permits unrestricted use, distribution, and reproduction in any medium, provided the original author and source are credited.

**Funding:** This work was supported by MSD (Norge) AS, the Norway branch of Merck & Co., Inc., directed at overheads associated with the study (to AHR, SD, and KF), Akershus University Hospital Grant 2012-101 (to AHR), the Norwegian Cancer Society Grant 2012-105 (to AHR), and the South-Eastern Norway Regional Health Authority Grants 2010-014, 2012-002, and 2013-101 (all to AHR). MGS is PhD Research Fellow and EK and KR are Postdoctoral Research Fellows of the South-Eastern Norway Regional Health Authority. The funders had no role in study design, data collection and analysis, decision to publish, or preparation of the manuscript.

**Competing Interests:** This work was supported by MSD (Norge) AS, the Norway branch of Merck & Co., Inc., directed at overheads associated with the study. Moreover, this does not alter our adherence to all the PLoS ONE policies on sharing data and materials.

\* E-mail: a.h.ree@medisin.uio.no

## Introduction

Modern radiation oncology will require a synergy between high-precision radiotherapy protocols and innovative approaches for biological optimization of radiation effect. From a clinical perspective, new insights into molecular radiobiology will provide a unique opportunity for combining systemic targeted therapeutics with radiotherapy [1]. One example is the use of histone deacetylase (HDAC) inhibitors as potentially radiosensitizing drugs. Inhibition of HDAC enzymes leads to acetylation of histone and non-histone proteins, and the resultant changes in gene transcription cause alterations in key molecules that orchestrate a wide range of cellular functions, including cell cycle progression, DNA damage signaling and repair, and cell death by apoptosis and autophagy [2–5].

Following the demonstration that HDAC inhibitors enhanced radiation-induced clonogenic suppression of experimental *in vitro* and *in vivo* colorectal carcinoma models [6–9], but independently of the actual histone acetylation level at the time of radiation exposure [7,8], we conducted the Pelvic Radiation and Vorinostat (PRAVO) phase 1 study [10,11]. This trial, undertaken in sequential patient cohorts exposed to escalating dose levels of the HDAC inhibitor vorinostat combined with pelvic palliative radiotherapy for advanced gastrointestinal malignancy, was the first to report on the therapeutic use of an HDAC inhibitor in clinical radiotherapy. It was designed to demonstrate a number of key questions; whether the investigational agent reached the specific target (detection of tumor histone acetylation), the applicability of non-invasive tumor response assessment (using

functional imaging), and importantly, that the combination of an HDAC inhibitor and radiation was safe and tolerable.

The ultimate goal of a first-in-human therapy trial is to conclude with a recommended treatment dose for follow-up expanded trials, and in achieving this, a phase 1 study typically is designed to determine treatment toxicity and tolerability (in terms of dose-limiting toxicity and maximum-tolerated dose (MTD), respectively) [12,13]. For molecularly targeted agents, the dose that results in a relevant level of target modulation may differ greatly from the MTD, and generally, we do not have a good understanding of the relationship between the MTD and the dose required to achieve the desired therapeutic effect [1]. An optimum biological dose may be the dose that is associated with pharmacodynamic biomarkers reflecting the mechanism of drug action. In the setting of fractionated radiotherapy, this would ideally represent a radiosensitizing molecular event occurring at each radiation fraction, or in other words, a biological indicator with a transient and periodic expression profile. Importantly, tumor specimens for this particular purpose cannot be sampled after the patient has commenced the radiation treatment. Any signaling activity in on-treatment tumor samples would reflect the combined effect of radiation and the systemic drug, and the contribution of the latter would probably be indistinguishable from the effect of the actual accumulated radiation dose. Instead, the study can be designed to collect non-irradiated surrogate tissue both before the commencement of study treatment and on-treatment at time points reflecting the timing of administration of the systemic drug with regard to the fractionated radiotherapy protocol. In addition, as a general rule, biomarkers that have been previously established for single-agent therapy will require reevaluation in a first-in-human clinical trial combining a molecularly targeted compound with radiotherapy.

Within this context, *i.e.*, that the possible mechanism of radiosensitizing action of the molecularly targeted agent should be regarded a main objective in a combined-modality study with radiotherapy, the present study reports on a correlative analytical strategy for identifying possible biomarkers of HDAC inhibitor activity, using peripheral blood mononuclear cells (PBMC) from the PRAVO phase 1 study patients receiving pelvic palliative radiotherapy as an easily accessible surrogate tissue for vorinostat exposure [14]. Gene expression array analysis identified PBMC genes that from experimental models are known to be implicated in biological processes governed by HDAC inhibitors, and might be further developed as pharmacodynamic biomarkers of vorinostat activity in the setting of fractionated radiotherapy.

## Materials and Methods

### Ethics Statement

Both of the protocols for the PRAVO study (ClinicalTrials ID NCT00455351) and the phase 2, non-randomized study for patients with locally advanced rectal cancer (LARC) given neoadjuvant chemoradiotherapy (ClinicalTrials ID NCT00278694) were approved by the Institutional Review Board and the Regional Committee for Medical and Health Research Ethics South-East Norway (REC South-East, Permit Number S-06289 and S-05059, respectively), and were performed in accordance with the Declaration of Helsinki. Written informed consent was required for participation. Housing and all procedures involving animals were performed according to protocols approved by the Animal Care and Use Committee at Department of Comparative Medicine, Oslo University Hospital (Permit Number 885–2616–2919–2928–3688), in compliance with the

Norwegian National Committee for Animal Experiments' guidelines on animal welfare.

### PRAVO Study Patients and Objectives

The patient population was enrolled between February 2007 and May 2009. The principal eligibility criterion was histologically confirmed pelvic carcinoma scheduled to receive palliative radiation to 30 Gy in 3-Gy daily fractions. Other details on eligibility are given in the initial report [10]. This phase 1 dose-escalation study adopted a standard 3+3 expansion cohort design [12], where patients with advanced gastrointestinal carcinoma were enrolled onto four sequential dose levels of vorinostat (Merck & Co., Inc., Whitehouse Station, NJ, USA), starting at 100 mg daily with dose escalation in increments of 100 mg [10]. The primary objective was to determine tolerability of vorinostat, defined by dose-limiting toxicity and MTD, when administered concomitantly with palliative radiation to pelvic target volumes. Secondary objectives were to assess the biological activity of vorinostat, including the identification of possible biomarkers of HDAC inhibitor activity, and to monitor radiological response when given with pelvic radiotherapy. The study data on patient treatment tolerability, tumor histone acetylation following vorinostat administration, and treatment-induced changes in tumor volume and apparent distribution coefficient, as assessed by magnetic resonance imaging, have been reported in detail previously [10,11].

### Patient Blood Sampling and RNA Isolation

As depicted by Figure 1, peripheral blood, drawn on PAXgene Blood RNA Tubes (Qiagen Norge, Oslo, Norway), was collected at baseline (before commencement of study treatment; termed T0) and on-treatment the third treatment day, two and 24 hours after the patient had received the preceding daily dose of vorinostat (termed T2 and T24), respectively. A full set of three samples (T0, T2, and T24) was obtained from 14 of the 16 evaluable study patients (Table 1). The tubes were stored at  $-70^{\circ}\text{C}$  until analysis. Total PBMC RNA was isolated using PAXgene Blood RNA Kit (Qiagen), following the manufacturer's protocol. RNA concentration and quality were assessed using NanoDrop 1000 and Agilent 2100 Bioanalyzer (Thermo Fisher Scientific Norway, Oslo, Norway), respectively.

### Gene Expression Array Analysis

This analysis was performed by the Norwegian Genomics Consortium (Oslo, Norway). Briefly, cRNA synthesis, amplification, and hybridization to Illumina Human WG-6 v3 Expression BeadChip arrays (Illumina, Inc., San Diego, CA, USA), containing 48,000 probes, were carried out as per manufacturer's instructions. Signal intensities were extracted by the BeadArray Reader Software (Illumina), and raw data were imported into the GenomeStudio v2010.1 Software, Gene Expression module v1.6.0 (Illumina). The primary array data are available in the Gene Expression Omnibus data repository (GEO accession number GSE46703).

### Statistical and Functional Annotation Analyses of Array Data

Analysis was performed using Bioconductor vR2.11.1 and the Bioconductor packages lumi 1.14.0, linear models for microarray data (limma) 3.4.4, and illuminaHumanv3BeadID.db 1.6.0 (www.bioconductor.org). Following quality control and pre-processing, the data were  $\log_2$ -transformed, and differential gene expression between the sample groups T0, T2, and T24 was determined by

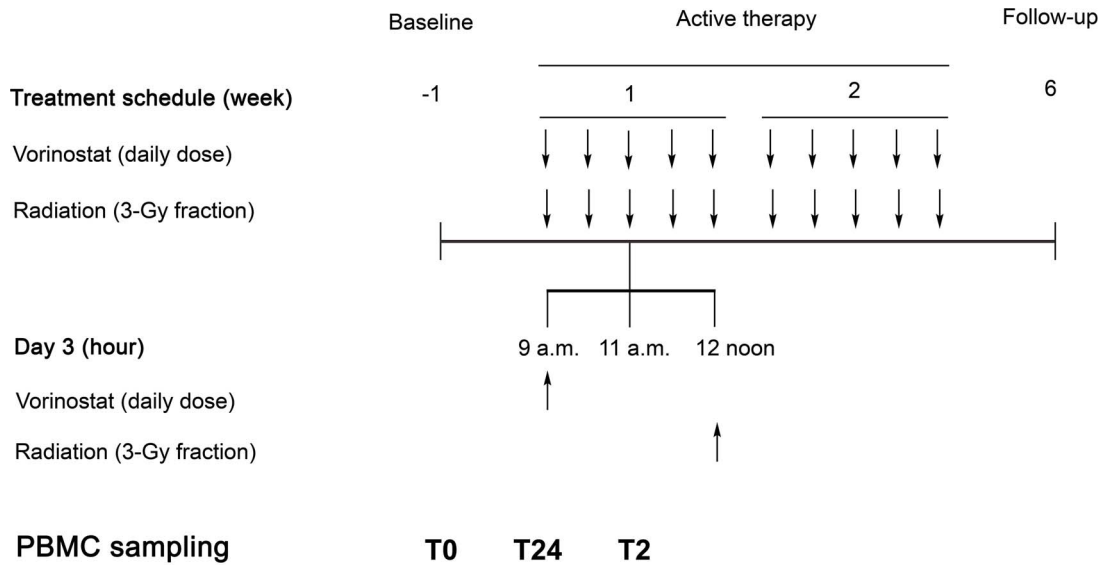

**Figure 1. Treatment schedule for the Pelvic Radiation and Vorinostat phase 1 study.** This study combined pelvic palliative radiotherapy (30 Gy in 3-Gy daily fractions; administered at 12 noon) with the histone deacetylase inhibitor vorinostat (given once daily at 9 a.m.) for advanced gastrointestinal malignancy. Arrows indicate administration of therapy. Study patients' peripheral blood mononuclear cells (PBMC) were sampled before commencement of treatment (T0) and on active therapy, two hours (T2; at 11 a.m. on day 3) and 24 hours (T24; at 9 a.m. on day 3) after the previous dose of vorinostat.  
doi:10.1371/journal.pone.0089750.g001

applying a Benjamin and Hochberg false discovery rate-adjusted *P*-value cut-off of 0.05. The total number of probes that were identified as differentially expressed was analyzed using the Database for Annotation, Visualization and Integrated Discovery, DAVID v6.7 [15,16]. Enriched biological processes and pathways were identified using the GOTERM\_BP\_FAT and KEGG\_PATHWAY algorithms, applying a *P*-value cut-off of 0.01. Differential expression analysis of the array data was also

performed using a *P*-value of 0.01 and a log<sub>2</sub>-fold change cut-off of 1.0 in order to identify genes whose expression changes could have potentially high biological significance.

**Experimental Human Colorectal Carcinoma Models**

The HCT116 and SW620 colorectal carcinoma cell lines were originally purchased from American Type Culture Collection (Manassas, VA, USA), and the identities of our laboratory's versions were confirmed by short tandem repeat analysis (Table S1). The LoVo-92 colorectal carcinoma cell line was kindly provided by Dr. Paul Noordhuis (VU Medical Centre, Amsterdam, The Netherlands) [17]. The cell lines were cultured as previously described [8,17]. Xenografts were established by subcutaneous injections of HCT116 or SW620 cell suspensions ( $2 \times 10^6$  cells) bilaterally on the flanks of locally bred female BALB/c nude (nu/nu) or Athymic Nude-Foxn1<sup>tm</sup> mice, 6–8 weeks of age. Vorinostat (Cayman Chemical, Ann Arbor, MI, USA; 100 mg/kg, dissolved in dimethyl sulfoxide to a concentration of 100 mg/ml immediately before use) or vehicle was given by intraperitoneal injection 13 days (HCT116) or 20 days (SW620) after establishment of xenografts. Three and 12 hours after administration, the tumors were extirpated, snap-frozen in liquid nitrogen, and stored at  $-70^\circ\text{C}$ . The xenografts were sectioned using a cryostat microtome prior to RNA extraction using TRIzol<sup>®</sup> Reagent (Invitrogen Dynal AS, Oslo, Norway). RNA concentration was assessed using the RNA/DNA calculator Gene Quant II (Pharmacia Biotech, Piscataway, NJ, USA).

**Tumor Samples from LARC Patients**

Primary tumor biopsies were sampled at the time of diagnosis from LARC patients enrolled onto a phase 2 study on neoadjuvant chemoradiotherapy (Table S2). The biopsy samples were snap-frozen in liquid nitrogen and stored at  $-70^\circ\text{C}$ , and sectioned on the cryostat microtome, essentially as previously reported [18], before RNA was extracted.

**Table 1. Study patients.**

| Vorinostat dose (mg daily) | Age (years) | Gender | Comment                         |
|----------------------------|-------------|--------|---------------------------------|
| 100                        | 77          | female |                                 |
| 200                        | 49          | female |                                 |
| 200                        | 64          | female |                                 |
| 200                        | 66          | female |                                 |
| 300                        | 47          | female | PBMC <sup>a</sup> not available |
| 300                        | 66          | female |                                 |
| 300                        | 77          | male   |                                 |
| 300                        | 81          | female |                                 |
| 300                        | 82          | male   |                                 |
| 300                        | 87          | female | PBMC <sup>a</sup> not available |
| 400                        | 45          | female |                                 |
| 400                        | 55          | male   |                                 |
| 400                        | 62          | male   |                                 |
| 400                        | 75          | female |                                 |
| 400                        | 83          | female |                                 |
| 400                        | 85          | female |                                 |

<sup>a</sup>Peripheral blood mononuclear cells.  
doi:10.1371/journal.pone.0089750.t001

## Reverse Transcriptase Quantitative Polymerase Chain Reaction (RT-qPCR) Analysis

cDNA was synthesized from total RNA using the qScript™ cDNA Synthesis Kit (Quanta BioSciences, Inc., Gaithersburg, MD, USA). The qPCR was run in Perfecta qPCR Supermix (Quanta), on iCycler (Bio-Rad Laboratories Norway, Oslo, Norway) and with all reactions in parallel. Primers were designed using ProbeFinder Assay Design Software ([www.roche-applied-science.com/sis/rtPCR/upl/ezhome.html](http://www.roche-applied-science.com/sis/rtPCR/upl/ezhome.html)), and were obtained from the Universal ProbeLibrary collection (Roche Applied Sciences, Oslo, Norway). Primer sequences are listed in Table S3. Amplified cDNA generated from the reference cell line (LoVo-92) was included on all PCR plates for relative quantification purposes (correction of plate-to-plate variation). Data were normalized to the expression levels of two reference genes; *YARS*, encoding tyrosyl-tRNA synthetase, and *TBP*, encoding the TATA box-binding protein. When tested in the patient samples, the reference genes had equal expression per ng of cDNA, independent of patient treatment (vorinostat dose and time after administration). The data were analyzed using the GeneExpression Analysis for iCycler iQ® Real-Time PCR Detection System Software (BioRad), and were calculated relative to the level in the reference cell line and subsequently  $\log_2$ -transformed.

## Statistical Analysis of qPCR Data

Analysis was performed using Predictive Analytics SoftWare Statistics version 19.0 (SPSS Inc., Chicago, IL, USA). Q-Q plots were applied to test whether the data were normally distributed or not, before differences between groups were analyzed using two-sided Student *t*-test for the PBMC samples and Mann-Whitney *U* test for xenograft samples. *P*-values less than 0.05 were considered statistically significant.

## Results

### PBMC Transcriptional Response to Vorinostat – Biological Processes and Pathways

Table 1 gives study patient baseline characteristics; the full study data on treatment tolerability and response have been reported previously [10,11]. Of the 14 patients that provided a full set of PBMC samples (T0, T2, and T24), one patient was treated at vorinostat 100 mg once daily and three patients at the 200 mg dose level, whereas four and six patients received the medication at 300 or 400 mg once daily, respectively. Importantly, as vorinostat-induced tumor histone acetylation had been observed at all dose levels [10], the array data from all patient samples at each time point (T0, T2, and T24) were pooled, irrespective of the vorinostat dose administered to the patients. This was done to increase the statistical power of the testing on analysis of differential gene expression between the individual time points. As shown by Figure 2, approximately 2,100 probes were differentially expressed both at two hours of vorinostat exposure (T2 *versus* T0) and on the T24 *versus* T2 comparison when applying the *P*-value cut-off of 0.05. Of these, 1,602 transcripts were found to be altered in both comparisons, and furthermore, no significantly differential expression was observed when comparing the T0 and T24 groups. Hence, all of the 1,602 mutual probes that were identified had a transient change in expression level from T0, with approximately one half found to be up-regulated and thus, the other half down-regulated at T2, followed by the opposite directional change to baseline expression at T24 (data not shown).

Functional annotation analysis of the differentially expressed genes in patients' PBMC identified several enriched biological processes. Comparison of the baseline PBMC transcription profile

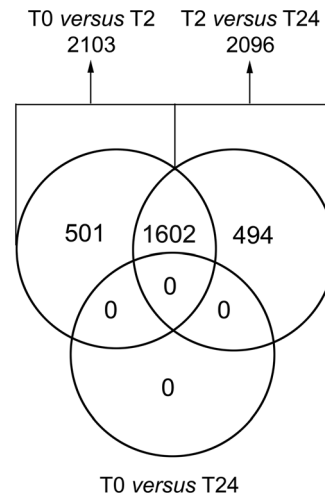

**Figure 2. Venn diagram illustrating differentially expressed genes.** Study patients' peripheral blood mononuclear cells were sampled at baseline (T0) and on-treatment two and 24 hours after administration of the daily dose of the study medication vorinostat (T2 and T24, respectively). Gene expression was analyzed by Illumina Human WG-6 v3 Expression BeadChip arrays. The array data from all patient samples at each time point (T0, T2, and T24) were pooled for the analysis. Probes with false discovery rate-adjusted *P*-values less than 0.05 were considered differentially expressed and subjected to Venn analysis, comparing by pairs T2 *versus* T0, T24 *versus* T2, and T24 *versus* T0. The figures represent numbers of probes in common for the various conditions.

doi:10.1371/journal.pone.0089750.g002

with that obtained two hours after vorinostat administration (T2 *versus* T0) showed that 69 biological processes were over-represented, whereas the corresponding comparison of T24 *versus* T2 transcriptional profiles identified 106 processes (Table S4). As seen from Table 2, displaying the top-ten Gene Ontology terms for each of the two comparisons, seven out of the ten biological processes were present in both, with transcription being the most significant. In addition, the analysis identified enrichment of genes involved in catabolic processes, the cell cycle, RNA processing, chromatin modification, and chromosome organization. The top-three pathway networks for each of the two comparisons, in common for both, comprised signaling factors of the cell cycle, including the p53 pathway (Table 3).

### Vorinostat Activity in PBMC – Verification of Selected Biomarkers

Next, by introducing a  $\log_2$ -fold change cut-off of 1.0 while decreasing the *P*-value to 0.01 in order to identify gene expression changes with presumably high biological significance, the list of differentially expressed probes, all with a biphasic pattern of regulation from T0 through T2 and T24, was reduced to 38 candidates (Table 4). Within this panel, two genes had duplicate array probes, whereas no reference sequence could be identified for three other probes, leaving 33 known genes as transcriptionally regulated by vorinostat following this stringent statistical analysis of the array data.

Selection of genes for verification analysis by RT-qPCR was based on both the relevance in the DNA damage response, which is recognized as a significant mechanism contributing to clinical radiation sensitivity [19], and previous indication of regulation by HDAC inhibitors. Five of the 33 genes were found to fulfill both criteria: *MYC* [20,21] among the ten genes repressed at T2 and

**Table 2.** Enriched biological processes in patients' peripheral blood mononuclear cells during 24 hours of vorinostat treatment.

| Biological process <sup>a</sup>                                       | n (%)     | P-value                 | Selected transcripts <sup>b</sup> |
|-----------------------------------------------------------------------|-----------|-------------------------|-----------------------------------|
| <b>T2 versus T0 <sup>c</sup></b>                                      |           |                         |                                   |
| <b>GO:0006350</b> transcription                                       | 253 (17)  | 5.1 × 10 <sup>-14</sup> | <i>MYC, DDIT3</i>                 |
| <b>GO:0044265</b> cellular macromolecule catabolic process            | 107 (7.2) | 8.2 × 10 <sup>-11</sup> | <i>MYC, BARD1</i>                 |
| <b>GO:0044257</b> cellular protein catabolic process                  | 93 (6.3)  | 1.7 × 10 <sup>-10</sup> | <i>BARD1</i>                      |
| <b>GO:0007049</b> cell cycle                                          | 111 (7.5) | 2.3 × 10 <sup>-10</sup> | <i>MYC, MSH6, BARD1, DDIT3</i>    |
| GO:0051603 proteolysis involved in cellular protein catabolic process | 92 (6.2)  | 2.9 × 10 <sup>-10</sup> | <i>BARD1</i>                      |
| GO:0019941 modification-dependent protein catabolic process           | 89 (6.0)  | 3.4 × 10 <sup>-10</sup> | <i>BARD1</i>                      |
| <b>GO:0009057</b> macromolecule catabolic process                     | 111 (7.5) | 3.4 × 10 <sup>-10</sup> | <i>MYC, BARD1</i>                 |
| GO:0030163 protein catabolic process                                  | 94 (6.6)  | 3.9 × 10 <sup>-10</sup> | <i>BARD1</i>                      |
| <b>GO:0006396</b> RNA processing                                      | 84 (5.6)  | 1.8 × 10 <sup>-9</sup>  |                                   |
| <b>GO:0045449</b> regulation of transcription                         | 276 (19)  | 5.0 × 10 <sup>-9</sup>  | <i>MYC, DDIT3</i>                 |
| <b>T24 versus T2 <sup>c</sup></b>                                     |           |                         |                                   |
| <b>GO:0006350</b> transcription                                       | 260 (17)  | 8.3 × 10 <sup>-16</sup> | <i>MYC, DDIT3</i>                 |
| <b>GO:0007049</b> cell cycle                                          | 114 (7.5) | 2.6 × 10 <sup>-11</sup> | <i>MYC, MSH6, BARD1, DDIT3</i>    |
| <b>GO:0045449</b> regulation of transcription                         | 286 (19)  | 5.4 × 10 <sup>-11</sup> | <i>MYC, DDIT3</i>                 |
| GO:0016568 chromatin modification                                     | 55 (3.6)  | 1.3 × 10 <sup>-10</sup> |                                   |
| <b>GO:0006396</b> RNA processing                                      | 86 (5.6)  | 3.7 × 10 <sup>-10</sup> |                                   |
| <b>GO:0044265</b> cellular macromolecule catabolic process            | 104 (6.8) | 8.8 × 10 <sup>-10</sup> | <i>MYC, BARD1</i>                 |
| GO:0051276 chromosome organization                                    | 78 (5.1)  | 9.6 × 10 <sup>-10</sup> | <i>MSH6</i>                       |
| GO:0022402 cell cycle process                                         | 85 (5.6)  | 4.1 × 10 <sup>-9</sup>  | <i>MYC, MSH6, BARD1, DDIT3</i>    |
| <b>GO:0044257</b> cellular protein catabolic process                  | 89 (5.8)  | 4.3 × 10 <sup>-9</sup>  | <i>BARD1</i>                      |
| <b>GO:0009057</b> macromolecule catabolic process                     | 107 (7.0) | 6.4 × 10 <sup>-9</sup>  | <i>MYC, BARD1</i>                 |

<sup>a</sup>Gene Ontology (GO) terms in bold: present in both comparisons.

<sup>b</sup>Verified by reverse transcriptase quantitative polymerase chain reaction analysis.

<sup>c</sup>T0 represents baseline peripheral blood mononuclear cells (PBMC) samples; T2 and T24 represent PBMC samples collected two and 24 hours, respectively, after the patients had received the daily dose of vorinostat.

doi:10.1371/journal.pone.0089750.t002

correspondingly, *GADD45B* [22], *MSH6* [23,24], *BARD1* [25,26], and *DDIT3* [27,28] among the 23 induced genes; mean PBMC expression levels at T0 relative to reference cell line expression are given in Table S5. These genes were present within the enriched biological processes and pathways identified by the functional annotation analysis of the differentially expressed genes (Table 2 and Table 3), and the biphasic pattern of regulation in PBMC through T2 and T24 was confirmed with significant time-dependent changes ( $P < 0.01$ ) for all of the five genes (Figure 3).

### Vorinostat Activity in Experimental Tumors – Validation of Selected Biomarkers

We have previously shown histone hyperacetylation in vorinostat-treated human colorectal carcinoma xenograft models

(HCT116 and SW620), peaking three hours after vorinostat administration and with restored baseline levels of histone acetylation three to six hours later, without accumulative effect following repeat daily administration [8]. Hence, expression of the five selected genes was further assessed by RT-qPCR in HCT116 and SW620 xenografts, three and 12 hours after administering vorinostat to tumor-bearing mice; median control expression levels relative to reference cell line expression are given in Table S5. In the HCT116 model, a significant change ( $P < 0.05$ ) in vorinostat-induced expression was found for *MYC* only. A similar transient *MYC* repression, but without statistically significant differences in expression levels through the time points, was seen in the SW620 tumors (Figure 3).

**Table 3.** Enriched biological pathways in patients' peripheral blood mononuclear cells during 24 hours of vorinostat treatment.

| Biological pathway                                 | n (%)     | P-value                | Genes <sup>a</sup>                                                                                                            |
|----------------------------------------------------|-----------|------------------------|-------------------------------------------------------------------------------------------------------------------------------|
| hsa04130 SNARE interactions in vesicular transport | 10 (0.85) | 1.6 × 10 <sup>-4</sup> | <i>STX6, STX5, STX1A, STX12, STX16, USE1, BET1, BET1L, GOSR1, VAMP1</i>                                                       |
| hsa04115 p53 signaling pathway                     | 13 (1.1)  | 2.7 × 10 <sup>-4</sup> | <i>PMAIP1, RRM2B, SESN2, CDK4, CDK2, CCNE2, CCNE1, PPM1D, TNFRSF10B, RCHY1, APAF1, GADD45B, GADD45A</i>                       |
| hsa04110 cell cycle                                | 17 (1.5)  | 0.0012                 | <i>CCNH, ANAPC13, CDC23, CDK7, PTTG1, CDK4, ZBTB17, TGFBI, WEE1, CDK2, CCNE2, CCNE1, YWHAG, CDKN2D, GADD45B, GADD45A, MYC</i> |

<sup>a</sup>Genes in bold: verified by reverse transcriptase quantitative polymerase chain reaction analysis.

doi:10.1371/journal.pone.0089750.t003

**Table 4.** Differentially expressed genes in patients' peripheral blood mononuclear cells during 24 hours of vorinostat treatment. <sup>a</sup>

| Accession no. | Gene <sup>b</sup>     | Gene name                                                                      | T2 versus T0 <sup>c</sup> (log <sub>2</sub> -fold change) | T24 versus T2 <sup>c</sup> (log <sub>2</sub> -fold change) |
|---------------|-----------------------|--------------------------------------------------------------------------------|-----------------------------------------------------------|------------------------------------------------------------|
| NM_005627     | <i>SGK1</i>           | serum/glucocorticoid regulated kinase 1                                        | -1.58                                                     | 1.65                                                       |
| NM_016478     | <i>ZC3HC1</i>         | zinc finger, C3HC-type containing 1                                            | -1.43                                                     | 1.39                                                       |
| NM_175571     | <i>GIMAP8</i>         | GTPase, IMAP family member 8                                                   | -1.23                                                     | 1.34                                                       |
| NM_206938     | <i>MS4A7</i>          | membrane-spanning 4-domains, subfamily A, member 7                             | -1.21                                                     | 1.06                                                       |
| NM_002467     | <b><i>MYC</i></b>     | v-myc myelocytomatosis viral oncogene homolog (avian)                          | -1.20                                                     | 1.09                                                       |
| NM_001024938  | <i>SLC2A11</i>        | solute carrier family 2 (facilitated glucose transporter), member 11           | -1.16                                                     | 1.17                                                       |
| NM_004843     | <i>IL27RA</i>         | interleukin 27 receptor, alpha                                                 | -1.14                                                     | 1.05                                                       |
| NM_000104     | <i>CYP1B1</i>         | cytochrome P450, family 1, subfamily B, polypeptide 1                          | -1.13                                                     | 1.26                                                       |
| NM_207007     | <i>CCL4L2</i>         | chemokine (C-C motif) ligand 4-like 2                                          | -1.04                                                     | 1.26                                                       |
| NM_014167     | <i>CCDC59</i>         | coiled-coil domain containing 59                                               | -1.02                                                     | 1.00                                                       |
| NM_005346     | <i>HSPA1B</i>         | heat shock 70kDa protein 1B                                                    | 1.82                                                      | -2.02                                                      |
| NM_153812     | <i>PHF13</i>          | PHD finger protein 13                                                          | 1.80                                                      | -1.95                                                      |
| NM_001564     | <i>ING2</i>           | inhibitor of growth family, member 2                                           | 1.59                                                      | -1.71                                                      |
| NM_001564     | <i>ING2</i>           | inhibitor of growth family, member 2                                           | 1.56                                                      | -1.56                                                      |
| NM_001001870  | <i>none</i>           | <i>none</i>                                                                    | 1.42                                                      | -1.28                                                      |
| NM_016639     | <i>TNFRSF12A</i>      | tumor necrosis factor receptor superfamily, member 12A                         | 1.40                                                      | -1.33                                                      |
| NM_152339     | <i>SPATA2L</i>        | spermatogenesis associated 2-like                                              | 1.38                                                      | -1.46                                                      |
| NM_025079     | <i>ZC3H12A</i>        | zinc finger CCCH-type containing 12A                                           | 1.36                                                      | -1.29                                                      |
| NM_015675     | <b><i>GADD45B</i></b> | growth arrest and DNA-damage-inducible, beta                                   | 1.30                                                      | -1.17                                                      |
| NM_013368     | <i>SERTAD3</i>        | SERTA domain containing 3                                                      | 1.24                                                      | -1.30                                                      |
| NM_004219     | <i>PTTG1</i>          | pituitary tumor-transforming 1                                                 | 1.23                                                      | -1.35                                                      |
| NM_014711     | <i>CP110</i>          | CP110 protein                                                                  | 1.20                                                      | -1.21                                                      |
| NM_005341     | <i>ZBTB48</i>         | zinc finger and BTB domain containing 48                                       | 1.14                                                      | -1.03                                                      |
| NM_000179     | <b><i>MSH6</i></b>    | mutS homolog 6 (E. coli)                                                       | 1.13                                                      | -1.23                                                      |
| NM_153358     | <i>ZNF791</i>         | zinc finger protein 791                                                        | 1.13                                                      | -1.07                                                      |
| NM_006494     | <i>ERF</i>            | Ets2 repressor factor                                                          | 1.12                                                      | -1.06                                                      |
| NR_002734     | <i>PTTG3P</i>         | pituitary tumor-transforming 3, pseudogene                                     | 1.11                                                      | -1.18                                                      |
| NM_016605     | <i>FAMS3C</i>         | family with sequence similarity 53, member C                                   | 1.07                                                      | -1.13                                                      |
| NM_004219     | <i>PTTG1</i>          | pituitary tumor-transforming 1                                                 | 1.07                                                      | -1.13                                                      |
| not available | <i>none</i>           | transcribed locus Hs.559604                                                    | 1.07                                                      | -1.08                                                      |
| NM_000024     | <i>ADRB2</i>          | adrenergic, beta-2-, receptor, surface                                         | 1.07                                                      | -1.07                                                      |
| XM_926814     | <i>none</i>           | <i>none</i>                                                                    | 1.05                                                      | -1.19                                                      |
| NM_006806     | <i>BTG3</i>           | BTG family, member 3                                                           | 1.05                                                      | -1.04                                                      |
| NM_031212     | <i>SLC25A28</i>       | solute carrier family 25 (mitochondrial iron transporter), member 28           | 1.05                                                      | -1.00                                                      |
| NM_000465     | <b><i>BARD1</i></b>   | BRCA1 associated RING domain 1                                                 | 1.02                                                      | -1.23                                                      |
| NM_004083     | <b><i>DDIT3</i></b>   | DNA-damage-inducible transcript 3                                              | 1.02                                                      | -1.08                                                      |
| NM_052901     | <i>SLC25A25</i>       | solute carrier family 25 (mitochondrial carrier; phosphate carrier), member 25 | 1.02                                                      | -1.06                                                      |
| NM_024954     | <i>UBTD1</i>          | ubiquitin domain containing 1                                                  | 1.01                                                      | -1.01                                                      |

<sup>a</sup>Log<sub>2</sub>-fold change higher than 1.0; *P*-value less than 0.01.

<sup>b</sup>Genes in bold: chosen for validation of expression in the study patients' peripheral blood mononuclear cells (PBMC) samples and human colorectal carcinoma xenograft models.

<sup>c</sup>T0 represents baseline PBMC samples; T2 and T24 represent PBMC samples collected two and 24 hours, respectively, after the patients had received the daily dose of vorinostat.

doi:10.1371/journal.pone.0089750.t004

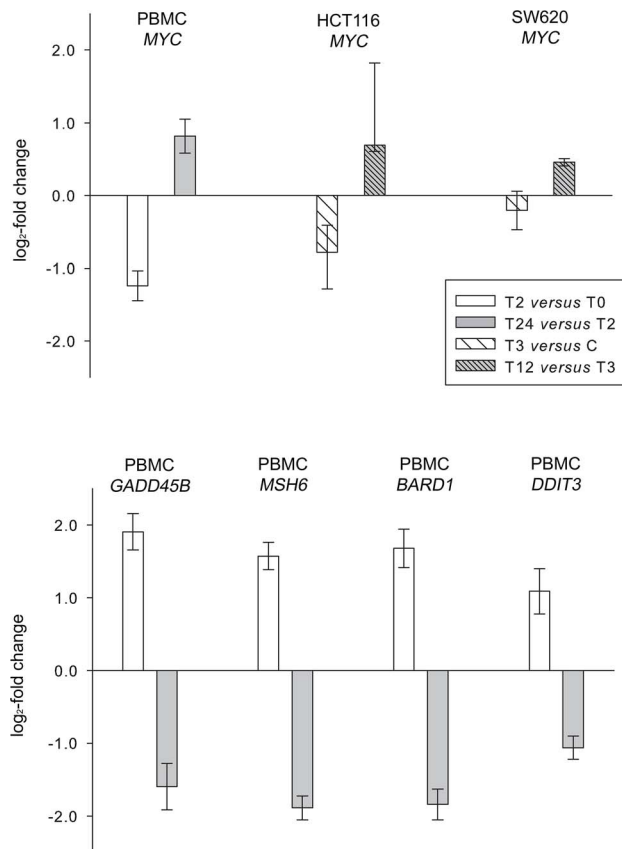

**Figure 3. Validation of vorinostat-regulated expression of selected genes.** Study patients' peripheral blood mononuclear cells (PBMC) were sampled at baseline (T0) and on-treatment two (T2) and 24 (T24) hours after administration of the daily dose of the study medication vorinostat, and expression of *MYC*, *GADD45B*, *MSH6*, *BARD1*, and *DDIT3* was analyzed by reverse transcriptase quantitative polymerase chain reaction (RT-qPCR). Correspondingly, mice bearing HCT116 or SW620 xenografts were injected intraperitoneally with vehicle (control, C) or vorinostat, and xenografts were harvested three (T3) and 12 (T12) hours after injection for RT-qPCR analysis of *MYC* expression. Relative gene expression ( $\log_2$ -fold change) for each comparison is given as mean  $\pm$  SEM of the PBMC sample values ( $n=14$ ) and as median and range of the values from control ( $n=8$  for HCT116;  $n=4$  for SW620) and vorinostat-treated ( $n=4$  for HCT116;  $n=2$  for SW620) xenografts. The compared gene expression levels were significantly different within the PBMC ( $P<0.01$ ) and HCT116 ( $P<0.05$ ) sample groups, while the differences were non-significant for the SW620 tumors. doi:10.1371/journal.pone.0089750.g003

### LARC – Primary Tumor *MYC* Expression

On identifying *MYC* repression as a possible biomarker of HDAC inhibitor activity from the strategy of analyzing, firstly, PRAVO study patients' PBMC, and secondly, vorinostat-treated colorectal carcinoma xenografts, and additionally recognizing this drug as a rational approach for biological optimization of radiation effect in pelvic gastrointestinal carcinoma [10], we investigated whether *MYC* might be expressed in the target tissue of a well-established pelvic radiotherapy protocol. In 27 LARC patients receiving neoadjuvant chemoradiotherapy [18], *MYC* expression was detected in all primary tumor samples, though at highly variable levels (median expression value was 0.47 (range 0.020–4.9) relative to reference cell line expression), but was essentially not associated with patient characteristics or treatment outcome in this small cohort (Table S2).

## Discussion

Within the design of the PRAVO phase 1 study (Figure 1), combining the HDAC inhibitor vorinostat with fractionated radiation to pelvic targets volumes for determination of treatment tolerability and response, gene expression array analysis was performed of study patients' PBMC, sampled at baseline (T0) and on-treatment two and 24 hours (T2 and T24) after the patient had received the daily dose of vorinostat, in order to identify possible biomarkers of HDAC inhibitor activity. This strategy revealed 1,600 array probes with biphasic pattern of expression from T0 through T2 and T24 across all of the study patients. A significant number of these genes were found implicated in processes comprising gene regulation, the cell cycle, and chromatin biology. Applying stringent criteria for array data analysis, five genes were recognized both as players in the DNA damage response and targets for regulation by HDAC inhibitors, and were therefore selected for validation of expression pattern both in study patients' PBMC and in human colorectal carcinoma xenograft models. Of these, only *MYC* consistently showed rapid and transient repression in all conditions that were tested.

In the setting of fractionated radiotherapy, a synergistic drug should preferably elicit a radiosensitizing molecular event at each radiation fraction; hence, a pharmacodynamic biomarker should reflect the timing of drug administration with regard to radiation exposure in a periodic manner [1]. Importantly, in a prior preclinical *in vivo* study combining vorinostat and fractionated radiation, we observed that tumor histone acetylation, considered a biomarker of vorinostat activity in the radiotherapy target tissue, reached a maximum three hours after intraperitoneal vorinostat injection into the experimental animals and was restored to baseline acetylation level three to six hours later, but with a repetitive, transient induction of acetylation following repeat injections. Of note, tumor growth inhibition after fractionated radiation, representing a long-term phenotypic outcome of the experimental manipulations, was significantly enhanced both when radiation was delivered at peak and restored histone acetylation levels [8]. Consequently, tumor histone hyperacetylation did not seem to be required at the time of radiation exposure, leaving the question of the optimum temporal relationship between administration of the radiosensitizing drug and radiation delivery unaddressed.

In the PRAVO study, one patient at each vorinostat dose level had both baseline (before commencement of study treatment) and repeat tumor biopsy two-and-a-half hours after administration of vorinostat (on day 3 of the treatment protocol). Histone hyperacetylation was observed in all on-treatment biopsy samples [10], confirming the presence of vorinostat in the target at the time of the daily radiation exposure. However, given that one of the objectives of the study was to determine mechanisms of the presumed radiosensitizing action of vorinostat that were not simultaneously manifesting molecular perturbations elicited by the radiation itself, non-irradiated surrogate tissue was collected for the purpose of identifying new biomarkers. Several investigators have demonstrated PBMC histone hyperacetylation on HDAC inhibitor treatment [14,29,30]. With these aspects in mind, PBMC were deemed to represent a relevant surrogate tissue for studying radiosensitizing effects of vorinostat in the context of this clinical trial.

Interestingly, using the study patients' PBMC as surrogate tissue for vorinostat exposure, all of the 1,600 probes that were found to be common for the comparisons T2 *versus* T0 and T24 *versus* T2 in principle represented pharmacodynamic biomarkers of the chosen timing of vorinostat administration in the fractionated radiotherapy

protocol. The genes showed rapid and transient induction or repression, thus mirroring the kinetics of the histone acetylation response. This observation implies that the design of the PRAVO study, undertaken in patients with advanced gastrointestinal cancer, may not have provided the optimum context for detailed capture of molecular effects of vorinostat. Thus, ethical concerns may challenge the structure required within a clinical trial setting for evaluating novel biomarker endpoints. Nevertheless, in the PRAVO study, functional annotation analysis of the panel of 1,600 probes identified biological processes and pathways comprising gene regulation (transcription, RNA processing), cell cycle progression (including p53 signaling, commonly involved in the DNA damage response), and chromatin biology. These findings are consistent with well-known cellular perturbations following exposure of experimental tumor models to HDAC inhibitors [2–5].

Investigation of biomarkers of HDAC inhibitor activity has been undertaken in a number of clinical therapy trials. These include the demonstration of increased histone acetylation in patients' PBMC in the early trials [14,29,30] and the more recent confirmation of changes in tumor expression of acetylated histone and non-histone proteins [10,14,31,32], the HDAC2 enzyme [31] and HR23B protein [33,34], the latter being proposed as predictive biomarker [35], and of tumor proliferation index [36]. Plasma protein profiling has been done in glioblastoma patients receiving vorinostat in combination with an established cytotoxic regimen [37]. Furthermore, tumor gene expression array analysis has been performed in a study with the HDAC inhibitor panobinostat as single agent [38] and in one trial each of combining either vorinostat or valproate with other biologic agents (in non-small cell lung carcinoma and acute myeloid leukemia, respectively) [39,40]. To our knowledge, the present study is the first to report on gene expression array analysis as an attempt to identify pharmacodynamic biomarker(s) reflecting timing of HDAC inhibitor administration with regard to an established cytotoxic regimen.

The criteria for selecting genes for validation were both their presumed relevance in the DNA damage response and previous indications of regulation by an HDAC inhibitor [22–24,28,41], and additionally, in order to find 'tumor-specific' markers, omitting genes that typically might be associated with leukocyte biology. Four of the selected genes were induced by vorinostat in the study patients' PBMC but did not show a similar response in the experimental tumor models. *BARD1* encodes a nuclear factor with tumor suppressor activity [24], the stress response effectors encoded by *GADD45B* and *DDIT3* are implicated in cell cycle arrest, DNA repair, and apoptosis [42,43], and *MSH6* encodes a DNA mismatch repair protein [44]. To date, only three studies seem to have been published on their potential use as biomarkers of therapy response [45–47]. In contrast, the confirmation of *MYC* as the only one of the selected genes with rapid and transient change in expression in all tested conditions (*i.e.*, both in the study patients' PBMC and experimental tumor models) may point to a particular importance of *myc* in the therapeutic setting with fractionated radiation. Future investigations of vorinostat as possible radiosensitizing agent might be within a long-term curative radiotherapy protocol, for example as an additional component of neoadjuvant chemoradiotherapy for LARC. The confirmed presence of *MYC* expression in the intended radiotherapy target tissue (primary rectal tumors) in LARC patients encourages future exploration of this proto-oncogene as a novel biomarker endpoint.

The *myc* protein acts both as transcriptional activator and repressor, regulating a myriad of genes that collectively conduct cell cycle progression, apoptosis, angiogenesis, and genetic instability [48]. Specifically, it has been suggested that *myc*

activates DNA damage repair genes [20], and interestingly, that *myc* in hypoxic tumors acts synergistically with the transcription factor hypoxia-inducible factor type 1 $\alpha$ , HIF-1 $\alpha$  [49,50]. Recent evidence indicates that HDAC inhibition suppresses HIF-1 $\alpha$  activity [51,52]. Consequently, mitigation of DNA damage repair capacity through suppression of *myc*/HIF-1 $\alpha$  synergy in hypoxic tumors [53,54], typically being resistant to radiation, provides an appealing explanation for the radiosensitizing effect of HDAC inhibitors.

However, conflicting data have been presented as to how HDAC inhibition may influence the *myc* protein itself. Whereas inhibition of various HDAC enzymes has been shown to cause *myc* repression in a range of human cancer cell lines [21,55–57], which corresponds well with the data in the present study, specific nuclear induction of *myc* to mediate HDAC inhibitor-induced apoptosis in glioblastoma cell lines has also been demonstrated [58]. Interestingly, in nasopharyngeal carcinoma cells that were resistant to radiation, *myc* was found to be essential through the transcriptional activation of cell cycle checkpoint kinases [59], which are signaling factors implicated in DNA damage repair, thereby facilitating tumor cell survival following radiation exposure. On the contrary, although radiosensitization was conferred by HDAC inhibition both in hypoxic and normoxic hepatocellular carcinoma cells, a lower level of *myc* expression was associated with the hypoxic and more radioresistant condition [60]. Of particular note, in the present study, the vorinostat-induced repression of *MYC* was found both in study patients' PBMC, clearly representing normoxic tissue, and experimental tumors that also were tested under normoxic conditions.

In conclusion, integral in the PRAVO study design was the collection of non-irradiated surrogate tissue for the identification of biomarker(s) of vorinostat activity to reflect the timing of administration and also suggest the mechanism of action of the HDAC inhibitor. This objective was achieved by gene expression array analysis of study patients' PBMC and as a consequence, the identification of genes that from experimental models are known to be implicated in biological processes and pathways governed by HDAC inhibitors. Importantly, all of the identified genes showed rapid and transient induction or repression and therefore, in principle, fulfilled the requirement of being pharmacodynamic biomarkers for this radiosensitizing drug in fractionated radiotherapy. Among the identified candidate genes, *MYC* repression was found in all patient samples and tested experimental conditions, possibly underscoring the impact of the *myc* proto-oncogene in this particular therapeutic setting.

## Supporting Information

### Table S1 Short tandem repeat (STR) profiles of cell lines.

(DOC)

### Table S2 Locally Advanced Rectal Cancer – Radiation Response Prediction (LARC-RRP): patient and treatment characteristics.

(DOC)

### Table S3 Primers and probes used for reverse transcriptase quantitative polymerase chain reaction analysis.

(DOC)

### Table S4 Enriched biological processes in patients' peripheral blood mononuclear cells during 24 hours of vorinostat treatment.

(DOC)



**Table S5 Baseline expression levels of genes assessed by reverse transcriptase quantitative polymerase chain reaction analysis.**

(DOC)

**Acknowledgments**

The authors thank Dr. Siri Tveito and Ms. Tove Øyjord for valuable assistance with laboratory procedures and Prof. Rob G. Bristow for helpful discussion.

**References**

1. Ree AH, Hollywood D (2013) Design and conduct of early-phase radiotherapy trials with targeted therapeutics: Lessons from the PRAVO experience. *Radiother Oncol* 108: 3–16.
2. Shabason JE, Tofilon PJ, Camphausen K (2011) Grand rounds at the National Institutes of Health: HDAC inhibitors as radiation modifiers, from bench to clinic. *J Cell Mol Med* 15: 2735–2744.
3. Khan O, La Thangue NB (2012) HDAC inhibitors in cancer biology: emerging mechanisms and clinical applications. *Immunol Cell Biol* 90: 85–94.
4. Spiegel S, Milstien S, Grant S (2012) Endogenous modulators and pharmacological inhibitors of histone deacetylases in cancer therapy. *Oncogene* 31: 537–551.
5. Groselj B, Sharma NL, Hamdy FC, Kerr M, Kiltie AE (2013) Histone deacetylase inhibitors as radiosensitizers: effects on DNA damage signalling and repair. *Br J Cancer* 108: 748–754.
6. Flatmark K, Nome RV, Folkvord S, Bratland A, Rasmussen H, et al. (2006) Radiosensitization of colorectal carcinoma cells by histone deacetylase inhibition. *Radiat Oncol* 1: 25.
7. Ree AH, Folkvord S, Flatmark K (2008) HDAC2 deficiency and histone acetylation. *Nat Genet* 40: 812–813.
8. Folkvord S, Ree AH, Furre T, Halvorsen T, Flatmark K (2009) Radiosensitization by SAHA in experimental colorectal carcinoma models – in vivo effects and relevance of histone acetylation status. *Int J Radiat Oncol Biol Phys* 74: 546–552.
9. Saelen MG, Ree AH, Kristian A, Fleten KG, Furre T, et al. (2012) Radiosensitization by the histone deacetylase inhibitor vorinostat under hypoxia and with capecitabine in experimental colorectal carcinoma. *Radiat Oncol* 7: 165.
10. Ree AH, Dueland S, Folkvord S, Hole KH, Seierstad T, et al. (2010) Vorinostat, a histone deacetylase inhibitor, combined with pelvic palliative radiotherapy for gastrointestinal carcinoma: the Pelvic Radiation and Vorinostat (PRAVO) phase 1 study. *Lancet Oncol* 11: 459–464.
11. Bratland A, Dueland S, Hollywood D, Flatmark K, Ree AH (2011) Gastrointestinal toxicity of vorinostat: reanalysis of phase 1 study results with emphasis on dose-volume effects of pelvic radiotherapy. *Radiat Oncol* 6: 33.
12. Le Tourneau C, Lee JJ, Siu LL (2009) Dose escalation methods in phase I cancer clinical trials. *J Natl Cancer Inst* 101: 1–13.
13. LoRusso PM, Boerner SA, Seymour L (2010) An overview of the optimal planning, design, and conduct of phase I studies of new therapeutics. *Clin Cancer Res* 16: 1710–1718.
14. Kelly WK, Richon VM, O'Connor O, Curley T, MacGregor-Curtelli B, et al. (2003) Phase I trial of histone deacetylase inhibitor: suberoylanilide hydroxamic acid administered intravenously. *Clin Cancer Res* 9: 3578–3588.
15. Huang DW, Sherman BT, Lempicki RA (2009) Systematic and integrative analysis of large gene lists using DAVID Bioinformatics Resources. *Nat Protoc* 4: 44–57.
16. Huang DW, Sherman BT, Lempicki RA (2009) Bioinformatics enrichment tools: paths toward the comprehensive functional analysis of large gene lists. *Nucleic Acids Res* 37: 1–13.
17. Noordhuis P, Laan AC, van de Born K, Losekoot N, Kathmann I, et al. (2008) Oxaliplatin activity in selected and unselected human ovarian and colorectal cancer cell lines. *Biochem Pharmacol* 76: 53–61.
18. Folkvord S, Flatmark K, Dueland S, de Wijn R, Grøholt KK, et al. (2010) Prediction of response to preoperative chemoradiotherapy in rectal cancer by multiplex kinase activity profiling. *Int J Radiat Oncol Biol Phys* 78: 555–562.
19. Begg AC, Stewart FA, Vens C (2011) Strategies to improve radiotherapy with targeted drugs. *Nat Rev Cancer* 11: 239–253.
20. Luoto KR, Meng AX, Wasylshen AR, Zhao H, Coackley CL, et al. (2010) Tumor cell kill by c-MYC depletion: role of MYC-regulated genes that control DNA double-strand break repair. *Cancer Res* 70: 8748–8759.
21. Seo SK, Jin HO, Woo SH, Kim YS, An S, et al. (2011) Histone deacetylase inhibitors sensitize human non-small cell lung cancer cells to ionizing radiation through acetyl p53-mediated c-myc down-regulation. *J Thorac Oncol* 6: 1313–1319.
22. Scuto A, Kirschbaum M, Kowolik C, Kretzner L, Juhasz A, et al. (2008) The novel histone deacetylase inhibitor, LBH589, induces expression of DNA damage response genes and apoptosis in Ph<sup>-</sup> acute lymphoblastic leukemia cells. *Blood* 111: 5093–5100.

**Author Contributions**

Conceived and designed the experiments: AHR SD KF. Performed the experiments: AHR MGS EK IHGØ KS KR TWA KF. Analyzed the data: AHR MGS EK KR KF. Contributed reagents/materials/analysis tools: AHR MGS EK IHGØ KS KR TWA KF. Wrote the paper: AHR. Managed patients, databases, and tissue banking: AHR MGS SD KF.

23. Shahi A, Lee JH, Kang Y, Lee SH, Hyun JW, et al. (2011) Mismatch-repair protein MSH6 is associated with Ku70 and regulates DNA double-strand break repair. *Nucleic Acids Res* 39: 2130–2143.
24. Rodríguez-Jiménez FJ, Moreno-Manzano V, Lucas-Dominguez R, Sánchez-Puelles JM (2008) Hypoxia causes downregulation of mismatch repair system and genomic instability in stem cells. *Stem Cells* 26: 2052–2062.
25. Li M, Yu X (2013) Function of BRCA1 in the DNA damage response is mediated by ADP-ribosylation. *Cancer Cell* 23: 693–704.
26. Zhang Y, Carr T, Dimtchev A, Zaer N, Dritschilo A, et al. (2007) Attenuated DNA damage repair by trichostatin A through BRCA1 suppression. *Radiat Res* 168: 115–124.
27. Forus A, Flørenes VA, Maclandsmo GM, Fodstad O, Myklebost O (1994) The protooncogene CHOP/GADD153, involved in growth arrest and DNA damage response, is amplified in a subset of human sarcomas. *Cancer Genet Cytogenet* 78: 165–171.
28. Namdar M, Perez G, Ngo L, Marks PA (2010) Selective inhibition of histone deacetylase 6 (HDAC6) induces DNA damage and sensitizes transformed cells to anticancer agents. *Proc Natl Acad Sci USA* 107: 20003–20008.
29. Sandor V, Bakke S, Robey RW, Kang MH, Blagosklonny MV, et al. (2002) Phase I trial of the histone deacetylase inhibitor, depsipeptide (FR901228, NSC 630176), in patients with refractory neoplasms. *Clin Cancer Res* 8: 718–728.
30. Byrd JC, Marcucci G, Parthun MR, Xiao JJ, Klisovic RB, et al. (2005) A phase 1 and pharmacodynamics study of depsipeptide (FK228) in chronic lymphocytic leukemia and acute myeloid leukemia. *Blood* 105: 959–967.
31. Munster PN, Thurn KT, Thomas S, Raha P, Lavecic M, et al. (2011) A phase II study of the histone deacetylase inhibitor vorinostat combined with tamoxifen for the treatment of patients with hormone therapy-resistant breast cancer. *Br J Cancer* 104: 1828–1835.
32. Ramaswamy B, Fiskus W, Cohen B, Pellegrino C, Hershman DL, et al. (2012) Phase I-II study of vorinostat plus paclitaxel and bevacizumab in metastatic breast cancer: evidence for vorinostat-induced tubulin acetylation and Hsp90 inhibition in vivo. *Breast Cancer Res Treat* 132: 1063–1072.
33. Khan O, Fotheringham S, Wood V, Stimson L, Zhang C, et al. (2010) HR23B is a biomarker for tumor sensitivity to HDAC inhibitor-based therapy. *Proc Natl Acad Sci USA* 107: 6532–6537.
34. Yeo W, Chung HC, Chan SL, Wang LZ, Lim R, et al. (2012) Epigenetic therapy using belinostat for patients with unresectable hepatocellular carcinoma: a multicenter phase I/II study with biomarker and pharmacokinetic analysis of tumors from patients in the Mayo Phase II Consortium and the Cancer Therapeutics Research Group. *J Clin Oncol* 30: 3361–3367.
35. Fotheringham S, Epping MT, Stimson L, Khan O, Wood V, et al. (2009) Genome-wide loss-of-function screen reveals an important role for the proteasome in HDAC inhibitor-induced apoptosis. *Cancer Cell* 15: 57–66.
36. Venugopal B, Baird R, Kristeleit R, Plummer R, Cowan R, et al. (2013) A phase I study of quisinostat [JNJ-26481585], an oral hydroxamate histone deacetylase inhibitor, in patients with advanced solid tumors. *Clin Cancer Res* 19: 4262–4272.
37. Chinnaiyan P, Chowdhary S, Potthast L, Prabhu A, Tsai YY, et al. (2012) Phase I trial of vorinostat combined with bevacizumab and CPT-11 in recurrent glioblastoma. *Neuro Oncol* 14: 93–100.
38. Ellis L, Pan Y, Smyth GK, George DJ, McCormack C, et al. (2008) Histone deacetylase inhibitor panobinostat induces clinical responses with associated alterations in gene expression profiles in cutaneous T-cell lymphoma. *Clin Cancer Res* 14: 4500–4509.
39. Khanim FL, Bradbury CA, Arrazi J, Hayden RE, Rye A, et al. (2009) Elevated FOSB-expression; a potential marker of valproate sensitivity in AML. *Br J Haematol* 144: 332–341.
40. Jones DR, Moskaluk CA, Gillenwater HH, Petroni GR, Burks SG, et al. (2012) Phase I trial of induction histone deacetylase and proteasome inhibition followed by surgery in non-small-cell lung cancer. *J Thorac Oncol* 7: 1683–1690.
41. Thompson ME (2010) BRCA1 16 years later: nuclear import and export processes. *FEBS J* 277: 3072–3078.
42. Liebermann DA, Tront JS, Sha X, Mukherjee K, Mohamed-Hadley A, et al. (2011) Gadd45 stress sensors in malignancy and leukemia. *Crit Rev Oncog* 16: 129–40.
43. Tabas I, Ron D (2011) Integrating the mechanisms of apoptosis induced by endoplasmic reticulum stress. *Nat Cell Biol* 13: 184–90.

44. Martin SA, Lord CJ, Ashworth A (2010) Therapeutic targeting of the DNA mismatch repair pathway. *Clin Cancer Res* 16: 5107–13.
45. Los G, Benbatoul K, Gately DP, Barton R, Christen R, et al. (1999) Quantitation of the change in GADD153 messenger RNA level as a molecular marker of tumor response in head and neck cancer. *Clin Cancer Res* 5: 1610–8.
46. Hirohata T, Asano K, Ogawa Y, Takano S, Amano K, et al. (2013) DNA mismatch repair protein (MSH6) correlated with the responses of atypical pituitary adenomas and pituitary carcinomas to temozolomide: the national cooperative study by the Japan Society for Hypothalamic and Pituitary Tumors. *J Clin Endocrin Metab* 98: 1130–6.
47. Ting S, Mairinger FD, Hager T, Welter S, Eberhardt WE, et al. (2013) ERCC1, MLH1, MSH2, MSH6, and  $\beta$ III-tubulin: resistance proteins associated with response and outcome to platinum-based chemotherapy in malignant pleural mesothelioma. *Clin Lung Cancer* 14: 558–67.
48. Meyer N, Penn LZ (2008) Reflecting on 25 years with MYC. *Nat Rev Cancer* 8: 976–990.
49. Dang CV, Kim JW, Gao P, Yustein J (2008) The interplay between MYC and HIF in cancer. *Nat Rev Cancer* 8: 51–56.
50. Podar K, Anderson KC (2010) A therapeutic role for targeting c-Myc/Hif-1-dependent signaling pathways. *Cell Cycle* 9: 1722–1728.
51. Ellis L, Hammers H, Pili R (2009) Targeting tumor angiogenesis with histone deacetylase inhibitors. *Cancer Lett* 280: 145–153.
52. Chen S, Sang N (2011) Histone deacetylase inhibitors: the epigenetic therapeutics that repress hypoxia-inducible factors. *J Biomed Biotechnol* 2011: 197946.
53. Huang LE (2008) Carrot and stick: HIF- $\alpha$  engages c-Myc in hypoxic adaptation. *Cell Death Differ* 15: 672–677.
54. Yoo YG, Hayashi M, Christensen J, Huang LE (2009) An essential role of the HIF-1 $\alpha$ -c-Myc axis in malignant progression. *Ann N Y Acad Sci* 1177: 198–204.
55. Kretzner L, Scuto A, Dino PM, Kowolik CM, Wu J, et al. (2011) Combining histone deacetylase inhibitor vorinostat with aurora kinase inhibitors enhances lymphoma cell killing with repression of c-Myc, hTERT, and microRNA levels. *Cancer Res* 71: 3912–3920.
56. Zhu C, Chen Q, Xie Z, Ai J, Tong L, et al. (2011) The role of histone deacetylase 7 (HDAC7) in cancer cell proliferation: regulation on c-Myc. *J Mol Med* 89: 279–289.
57. Liu PY, Xu N, Malyukova A, Scarlett CJ, Sun YT, et al. (2013) The histone deacetylase SIRT2 stabilizes Myc oncoproteins. *Cell Death Differ* 20: 503–514.
58. Bangert A, Cristofanon S, Eckhardt I, Abhari BA, Kolodziej S, et al. (2012) Histone deacetylase inhibitors sensitize glioblastoma cells to TRAIL-induced apoptosis by c-myc-mediated downregulation of cFLIP. *Oncogene* 31: 4677–4688.
59. Wang WJ, Wu SP, Liu JB, Shi YS, Huang X, et al. (2012) MYC regulation of CHK1 and CHK2 promotes radioresistance in a stem cell-like population of nasopharyngeal carcinoma cells. *Cancer Res* 73: 1219–1231.
60. Xie Y, Zhang J, Ye S, He M, Ren R, et al. (2012) SirT1 regulates radiosensitivity of hepatoma cells differently under normoxic and hypoxic conditions. *Cancer Sci* 103: 1238–1244.
